# Supplementary material for: A Regulatory Switch Alters Chromosome Motions at the Metaphase to Anaphase Transition
Source: PubMed Central journal article supplement — Cell Rep. Author manuscript; Available in PMC 2017 Nov 8. (PMC5130098; doi:10.1016/j.celrep.2016.10.046), 2016-11-08

# Velocity Distributions 1

## hTERT RPE-1 Anaphase (5100 steps total)

## HeLa Anaphase (9216 steps total)

## HeLa Metaphase (8625 steps total)

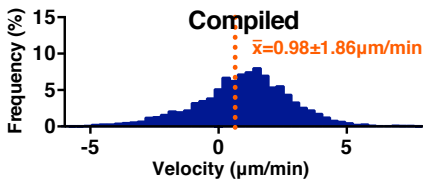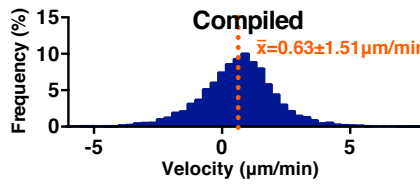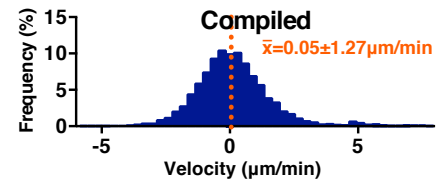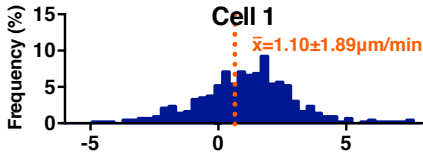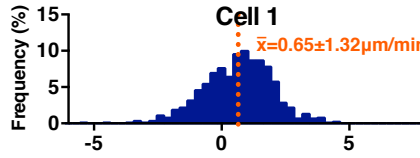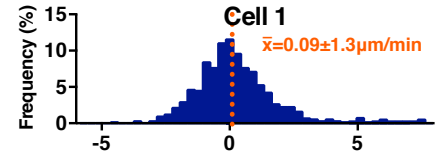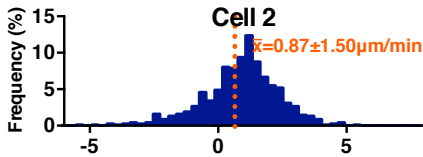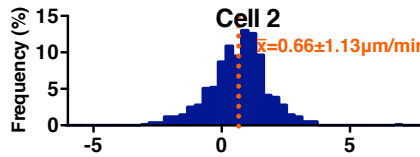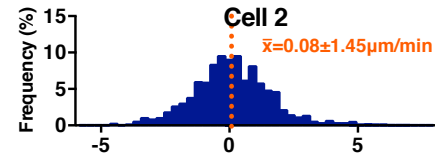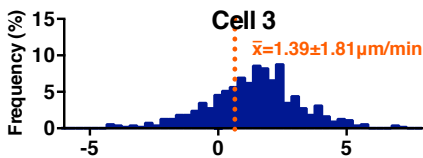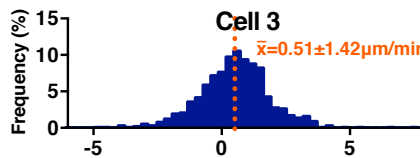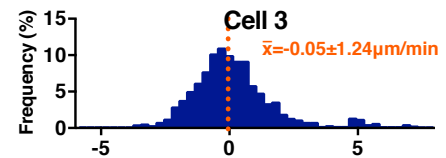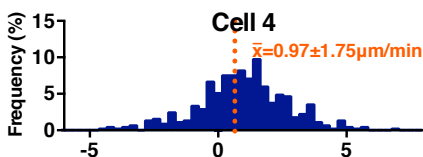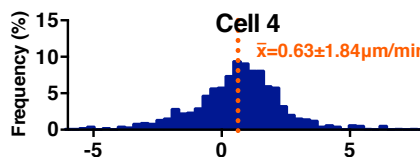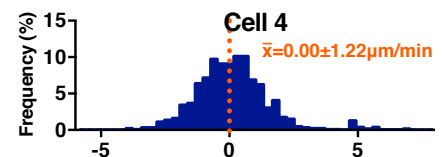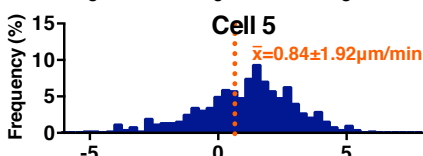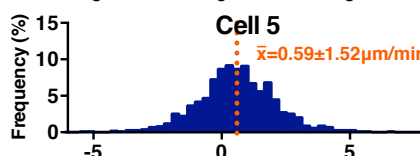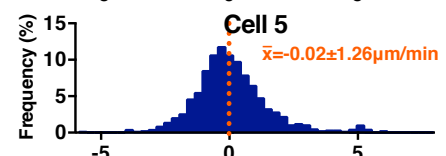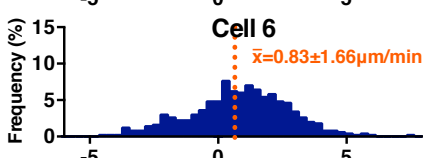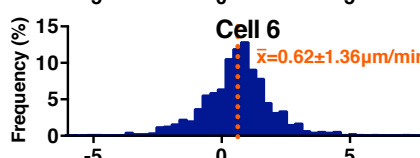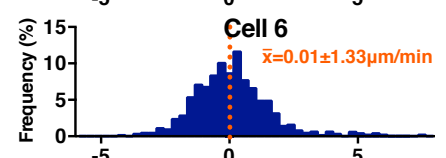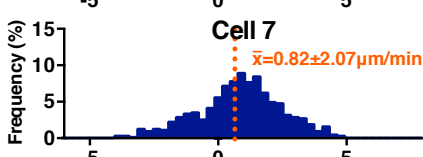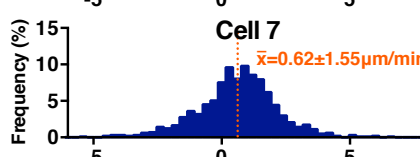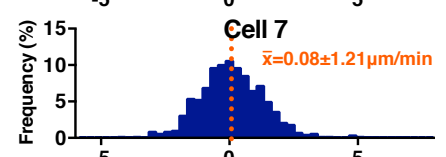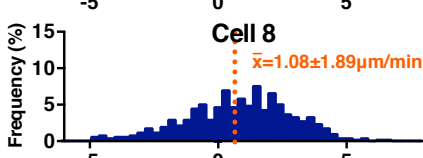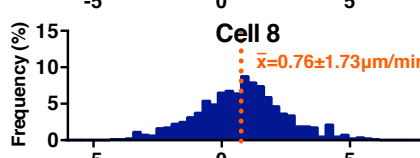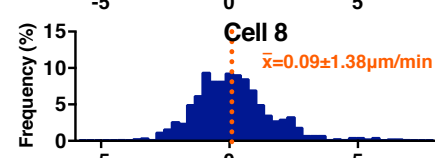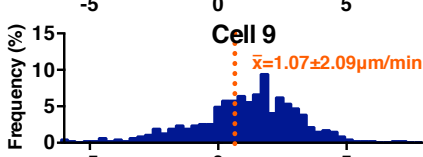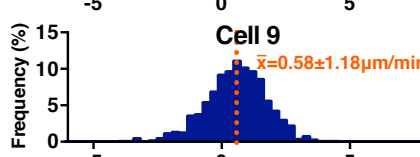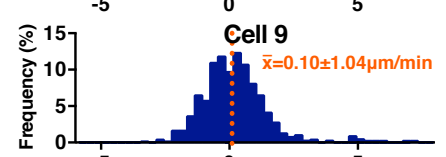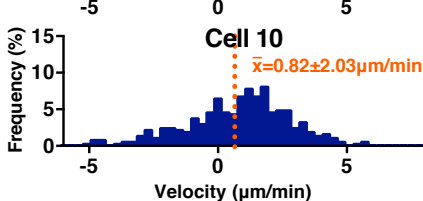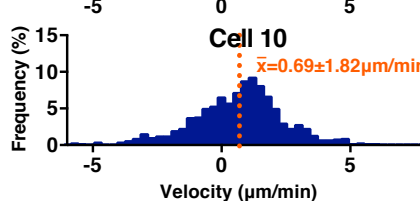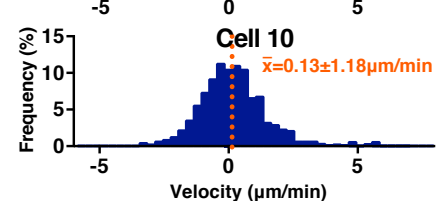

# Velocity Distributions 2

## HeLa in Okadaic Acid (11828 steps total)

## KID+KIF4A KO in Okadaic Acid (8924 steps total)

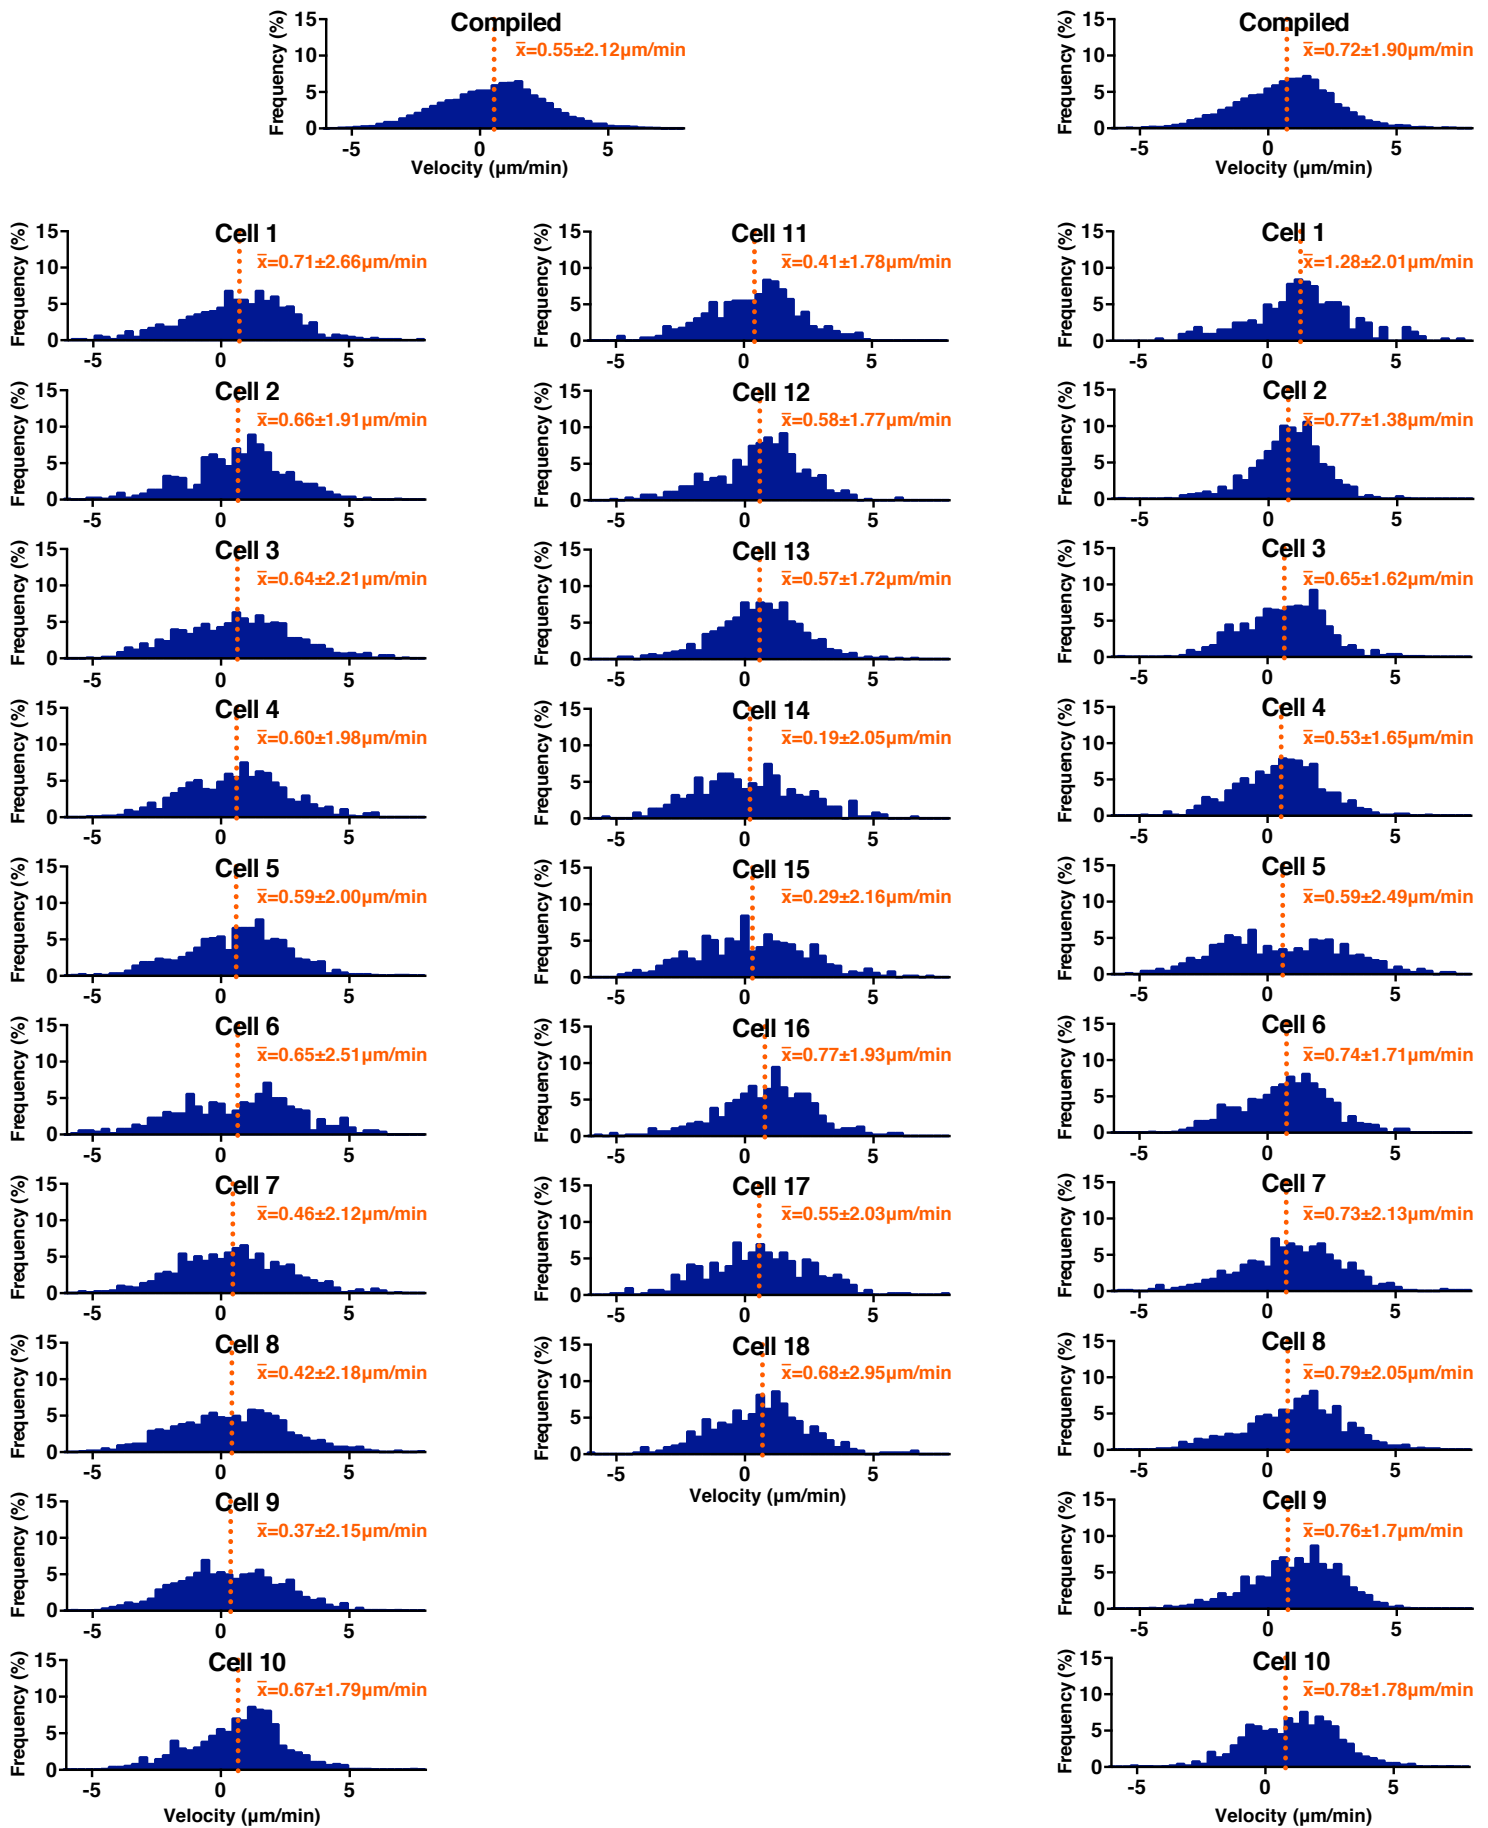

# Velocity Distributions 3

KID+KIF4A KO in Okadaic Acid  
(8924 steps total)

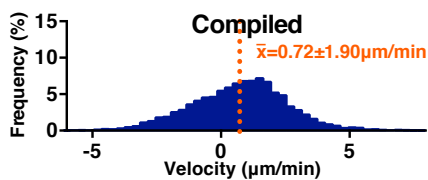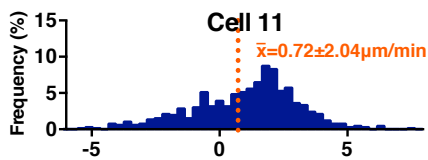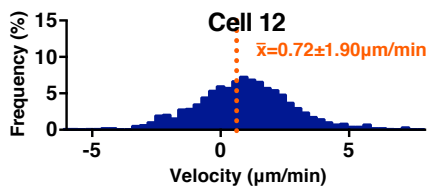

KIF18A RNAi in Okadaic Acid  
(4278 steps total)

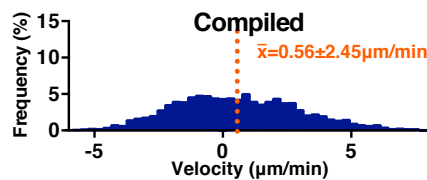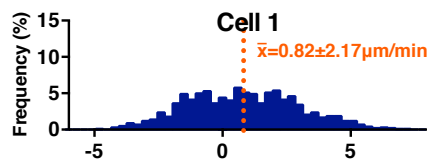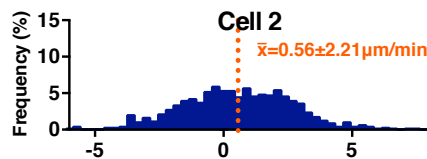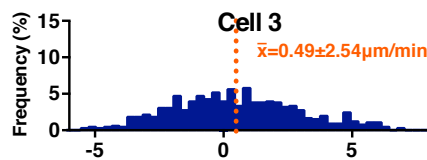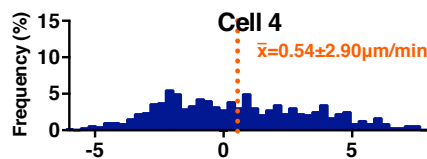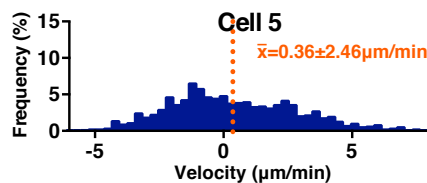

Ska1  $\Delta$ MTBD in Okadaic Acid  
(3806 steps total)

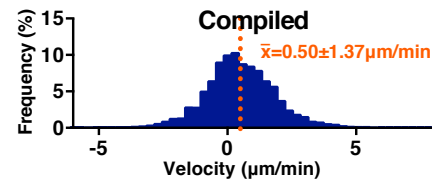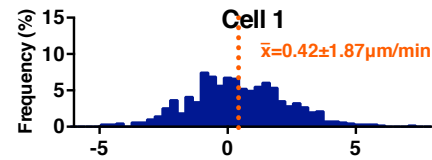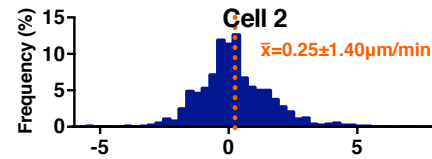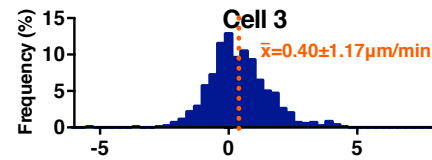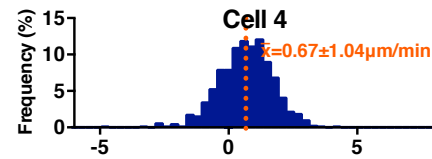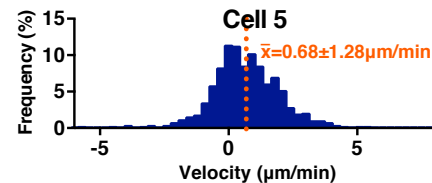

Supplement: NIHMS825931-supplement-sup.pdf [file NIHMS825931-supplement-sup.pdf]
